# Supplementary material
Source: PubMed Central journal article supplement (PMC5474222)
Supplement: NIHMS835212-supplement-supplement_1.pdf [file NIHMS835212-supplement-supplement_1.pdf]

**Supplementary table.** *Fit indices LCGA*

| Number of classes | Entropy      | Bayesian information criterion | Aikiake information criterion | Vuong-Lo-Mendell-Rubin likelihood test p-value |
|-------------------|--------------|--------------------------------|-------------------------------|------------------------------------------------|
| 1                 | N/A          | 10663.872                      | 10634.583                     | N/A                                            |
| 2                 | 0.775        | 10133.444                      | 10091.602                     | <0.0001                                        |
| 3                 | 0.700        | 10038.615                      | 9984.221                      | 0.0002                                         |
| <b>4</b>          | <b>0.646</b> | <b>10030.558</b>               | <b>9963.611</b>               | <b>0.035</b>                                   |
| 5                 | 0.653        | 10032.728                      | 9953.229                      | 0.153                                          |
